# Supplementary material
Source: PubMed Central journal article supplement (PMC4321756)
Supplement: NIHMS548856-supplement-Supplemental.pdf [file NIHMS548856-supplement-Supplemental.pdf]

## A. Pre-sort



## B. Post-sort



**Supplemental Figure 1: Purity of flow cytometry sorted CCR4+CCR6+, CCR4+CCR6-, CXCR3+CCR6+, and CXCR3+CCR6- T-cell subsets.** Shown is the expression of CD45RA, CCR4, CXCR3, and CCR6 on (A) total CD4+ T-cells before sorting and (B) sorted CCR4+CCR6+, CCR4+CCR6-, CXCR3+CCR6+, and CXCR3+CCR6- T-cells subsets. The % of each subset is indicated on the figure. Results are representative of experiments performed with cells from >10 different donors.



**Supplemental Figure 2: Expression of the HIV co-receptors CCR5 and CXCR4 on CXCR3+CCR6+ and CXCR3+CCR6- T-cells upon TCR triggering.** CXCR3+CCR6+ and CXCR3+CCR6- T-cell subsets were sorted by flow cytometry. Cells were stimulated via CD3/CD28 for 3 days and stained with CCR5 or CXCR4 Abs. Shown are results from one experiment representative of results obtained with cells from 2 different donors.



**Supplemental Figure 3: Proliferation of CCR4+CCR6+, CCR4+CCR6-, CXCR3+CCR6+, and CXCR3+CCR6- T-cells upon TCR triggering.** T-cell subsets loaded in CFSE (0.5  $\mu$ M) were stimulated via CD3/CD28 for 5 days. Cell proliferation is associated with CFSE dilution. The % of CFSE<sup>low</sup> cells is indicated in the figure for each T-cell subset. Experiments were performed with cells from two different donors.



**Supplemental Figure 4: Persistent decrease in the frequency of CCR4+CCR6+ and CXCR3+CCR6+ T-cell in HIV-infected patients despite viral-suppressive ART.** PBMC from HIV-infected and uninfected individuals were stained with CD3, CD4, CD45RA, CCR4, CXCR3, and CCR6 Abs and then analyzed by polychromatic flow cytometry. Shown is the frequency of (A) CCR6+ T-cells and (B) CCR4+CCR6+, CCR4+CCR6-, CXCR3+CCR6+, and CXCR3+CCR6- memory (CD45RA-) T-cell subsets in four CI on ART HIV-infected subjects (subjects #23, #24, #25, and #26; Table II) at different time points during therapy as compared to the median frequency of these T-cell subsets in n=13 HIV-uninfected controls (HIV-).



**Supplemental Figure 5: Cytokine/chemokine profiles in CCR4+CCR6+, CCR4+CCR6-, CXCR3+CCR6+, and CXCR3+CCR6- T-cell subsets.** Shown is the relative production of cytokines and chemokines by CCR4+CCR6+, CCR4+CCR6-, CXCR3+CCR6+, and CXCR3+CCR6- T-cell subsets from different uninfected donors. T-cells were sorted and stimulated, and cytokines assessed as described in the legends of Figs. 1C and 6B. For each cytokine the highest production by one T-cell subset was considered 100% and the relative production was calculated for the other three T-cell subsets. Each symbol represents one different donor. Horizontal lines indicate median values.
